# Supplementary material for: Multiple di-leucines in the ATP7A copper transporter are required for retrograde trafficking to the trans-Golgi network
Source: Royal Society of Chemistry journal article supplement (doi:10.1039/c6mt00093b), 2016-01-01
Supplement: c6mt00093b1.pdf [file c6mt00093b1.pdf]

# Supplementary Figure S1: Alignment of the synthetic stabilized mouse *Atp7a* cDNA sequence

(Synth\_mAtp7a) with the native *Atp7a* cDNA sequence (mAtp7a). Only the altered bases in the synthetic sequence are shown. Alignments were generated using Multiple Sequence Comparison by Log Expectation software (<http://www.ebi.ac.uk/Tools/msa/muscle/>) with output using Boxshade software ([http://embnet.vital-it.ch/software/BOX\\_form.html](http://embnet.vital-it.ch/software/BOX_form.html)).

|              |     |                                                                |
|--------------|-----|----------------------------------------------------------------|
| mATP7A       | 1   | ATGGAGCCAAGTGTGGATGCAAATTCAATTACTATCACTGTTGAGGGAATGACATGTATT   |
| Synth_mAtp7a | 1   | .....A..TTCA..C..C..T..CAGC..C..C.....C..C..A..G.....C..C..C   |
| mATP7A       | 61  | TCCTGTGTCCGGACCATTGAACAGCAGATTGGGAAAGTGAATGGTGTCCATCACATTAAA   |
| Synth_mAtp7a | 61  | AGT..C...A.A.....C..G..A.....C..A..G..C..C..G..T..C.....C..G   |
| mATP7A       | 121 | GTTTCACTAGAAGAAAAGAGTGCAACCATTATTTATGACCCTAAACTTCAGACTCCAAAG   |
| Synth_mAtp7a | 121 | ..CAGTT.G..G..G..A..C..T..G..C..C..C..T..C..GT.A..A..C..G...   |
| mATP7A       | 181 | ACCCTCCAAGAAGCTATCGATGACATGGGCTTTGATGCTCTTCTCCACAATGCTAACCCC   |
| Synth_mAtp7a | 181 | ..TT.A..G..G..C..T..C.....A..C..C..C..A..G.....C..C..T..T      |
| mATP7A       | 241 | CTCCCTGTCTTAACCAATACCGTGTTCCTGACTGTTACTGCTCCACTGACTCTGCCTTGG   |
| Synth_mAtp7a | 241 | ..A..C..TC.C..T..C..T..C.....C..C..C.....TT....CT....A...      |
| mATP7A       | 301 | GACCATATCCAAAGTACATTGCTCAAGACCAAGGGTGTGACTGGTGTAAAGATTTCCTCT   |
| Synth_mAtp7a | 301 | ..T..C.....G..C..GC..T.G.....G..A..C..C..C..C..C.....CAGT..A   |
| mATP7A       | 361 | CAGCAAAGAAGTGCAGTAGTCACCATAATTCCATCTGTGGTGAGTGCCAGTCAGATTGTG   |
| Synth_mAtp7a | 361 | ..A..GC.TTC...T..C..G..G..C..C..TAG...T..CTC...TTC.....C..T    |
| mATP7A       | 421 | GAGCTGGTCCCAGACCTCAGTTTACATGAGGAACTCAGGAGAAAAAGTCAGGAGCTTGT    |
| Synth_mAtp7a | 421 | ...T....T..T.....GTC.C.T.....C..A..A.....G..AAGT..C..C..C      |
| mATP7A       | 481 | GAAGAGCACAGCACGCCTCAGGCAGGGGAAGTCATGCTGAAGATGAAAGTGGAAGGGATG   |
| Synth_mAtp7a | 481 | ..G..A.....A..A..A..T..C..G.....C.....G..T..G..C...            |
| mATP7A       | 541 | ACCTGCCATTTCATGTACTAGCACCATTGAAGGAAAAGTTGGAAAGCTGCAAGGTGTTTCAG |
| Synth_mAtp7a | 541 | ..T..T..CAGT..C..CTCT.....C..G..C..G..C..G..A.....G.....C..A   |
| mATP7A       | 601 | CGCATTAAAGTGTCCCTAGACAACCAAGAAGCTACTATTGTTTTTCAACCTCATCTCATC   |
| Synth_mAtp7a | 601 | .....C..G..CAGT..T.....T..G..G..A..C..C..C..C..G.....C..G...   |
| mATP7A       | 661 | ACAGCAGAGGAAATAAAGAAGCAGATTGAAGCCGTGGGTTTCCCAGCCTTCATAAAAAAG   |
| Synth_mAtp7a | 661 | ..T..T..A..G..C.....A.....C..G..T..T..C..T..T..T.....C..G...   |
| mATP7A       | 721 | CAGCCGAAGTACCTCAAATTGGGAGCCATTGATGTTGAGCGCCTGAAGAACACACCGGTC   |
| Synth_mAtp7a | 721 | ..A..C.....T.G..GC.A.....C..C..C..AA.A.....T..T...             |
| mATP7A       | 781 | AAATCTTCAGAAGGATCTCAGCAAAAGAGCCCATCATATCCCAGTGACTCCACAACCATG   |
| Synth_mAtp7a | 781 | ..GAG.AGT..G..TAG...A..G...TCT..TAGC..C..TTCC..TAG...T.....    |

|              |      |                                                               |
|--------------|------|---------------------------------------------------------------|
| mATP7A       | 841  | TTCACCATAGAGGGCATGCATTGTAAATCGTGTGTGTCCAATATTGAAAGTGCTTTATCT  |
| Synth_mAtp7a | 841  | .....C..A..G.....C..C..GAGT..C..CAG...C..C..GTC...C..GAG.     |
| mATP7A       | 901  | ACACTCCAGTATGTAAGCAGTATAGTAGTTTCTTTAGAGAATAGGTCAGCCATTGTAAAG  |
| Synth_mAtp7a | 901  | ..TT.G.....C..TTCT..C..C..T..CAG.C.T.....CC.TAGT.....C..G...  |
| mATP7A       | 961  | TACAATGCAAGCTTAGTCACTCCAGAAATGCTGAGAAAGGCAATAGAGGCCATTTACCG   |
| Synth_mAtp7a | 961  | .....C..TTCTC.G.....C..T..G...T.AC.G..A..C..C..A..G..CAGT..T  |
| mATP7A       | 1021 | GGGCAATACAGAGTTAGTATTGCAAGTGAAGTTGAAAGTACCG---CCAGCTCTCCCTCC  |
| Synth_mAtp7a | 1021 | ..C..G...C.T..CTCC..C..TTC...G..C..GTC...T.CTT.T..TC..AG....  |
| mATP7A       | 1078 | AGCTCATCTCTTCAGAAGATGCCTTTGAACATAGTTAGCCAGCCTCTGACCCAAGAAGCT  |
| Synth_mAtp7a | 1081 | ..--..G..-..A..A.....C.....C..CTCT..A..CT.A..T..G..G..C       |
| mATP7A       | 1138 | GTGATAAACATAAAATGGCATGACTTGTAATTCTTGTGTGCAGTCTATAGAGGGTGTAATA |
| Synth_mAtp7a | 1138 | ..C.....C..C..G.....C..C..CAG...C..C..A..C..C..A..C..C..C     |
| mATP7A       | 1198 | TCAAAAAAGCCAGGTGTAAATCCATCCACGTGTCCCTCGCAAACAGCACAGGGACTATT   |
| Synth_mAtp7a | 1198 | AGT..G..A..T..C..G..GAG.....T..CAGTT.G..G...TCT..T..C..C..C   |
| mATP7A       | 1258 | GAATTTGATCCTCTACTAACCTCTCCAGAAACCTTGCGAGAAGCAATTGAAGACATGGGA  |
| Synth_mAtp7a | 1258 | ..G..C..C..A..G..G...AG...T..G..TC.AA.....T..C..G..T.....C    |
| mATP7A       | 1318 | TTTGATGCTGCCTTGCCAGCAGACATGAAAGAGCCACTGGTAGTGATAGCTCAGCCCTCA  |
| Synth_mAtp7a | 1318 | ..C..C..C..TC.T..T..T.....G..A..CT....T..C..C..A..A..TAGC     |
| mATP7A       | 1378 | CTGGAAACACCTCTTTTGCCCTCAAGT---AATGAGCTAGAAAATGTGATGACGTCAGTT  |
| Synth_mAtp7a | 1378 | T....G.---...CC....TAC.T...TCC..C...T....G..C..C.....TAGT..C  |
| mATP7A       | 1435 | CAGAACAAGTGTTACATACAGGTCTCTGGGATGACCTGTGCTTCTTGTGTAGCAAACATT  |
| Synth_mAtp7a | 1435 | ..A.....C.....C..A..TAG...C.....T..C..CAG...C..T..G.....C     |
| mATP7A       | 1495 | GAACGCAATTTAAGACGAGAAGAAGGAATATATTCTGTACTTGTTGCCCTAATGGCTGGC  |
| Synth_mAtp7a | 1495 | ..GA.A..CC..C.TA....G..G..C..C..CAG...TT.A..C..T..C.....C..A  |
| mATP7A       | 1555 | AAGGCAGAAGTAAGATATAACCCAGCTGTTATCCAACCCCGAGTGATAGCAGAGTTTATT  |
| Synth_mAtp7a | 1555 | .....T..G..TC.C..C.....T..C..C.....G..TA....C..C..T.....C..C  |
| mATP7A       | 1615 | CGAGAGCTTGGATTTGGAGCTATGGTGATGGAAAACGCTGGGGAAGGCAACGGCATCTTG  |
| Synth_mAtp7a | 1615 | A.....G..C..C.....C.....C.....G..T..C..C..G..A..T..A..TC.T    |
| mATP7A       | 1675 | GAAC TTGTTGTGAGAGGAATGACGTGTGCTTCCTGTGTCCATAAAATTGAATCAACACTC |
| Synth_mAtp7a | 1675 | ..GT.A..C..CC.T..C.....T..C..CAGT..C..G..C..G..C..GAGC..CT.G  |
| mATP7A       | 1735 | ACAAAACACAAAGGGATCTTCTACTGCTCTGTGGCCCTGGCAACTAACAAAGCACATATT  |
| Synth_mAtp7a | 1735 | ..C..G.....G..A.....AGC..T..AT....C..C..T..G..C..C..C         |
| mATP7A       | 1795 | AAATATGATCCAGAAATTATTGGTCCCAGAGATATTATCCATACCATCGGAAGCTTAGGC  |
| Synth_mAtp7a | 1795 | ..G..C..C..T..G..C..C..A..TC.T..C..C.....C.....GTCA..G..T     |
| mATP7A       | 1855 | TTTGAAGCTTCTTTGGTCAAGAAAGATCGATCAGCCAACCACTTAGATCATAAACGAGAA  |
| Synth_mAtp7a | 1855 | ..C..G..CAGC..A.....G..CA..AGC..G.....TC....C..C..GA....G     |

|              |      |                                                               |
|--------------|------|---------------------------------------------------------------|
| mATP7A       | 1915 | ATAAAACAATGGAGAGGGTCTTTCTTGAGCCTGTTTTCTGTATCCCTGTAATGGGA      |
| Synth_mAtp7a | 1915 | ..C..G..G...C.C..AAGC..TT.G..TTCAT...C..T..C....A..G....G     |
| mATP7A       | 1975 | CTGATGGTCTATATGATGGTTATGGATCACCACCTTGCAACTCTTCACCATAATCAGAAC  |
| Synth_mAtp7a | 1975 | T.....G..C.....A.....C..T..TT.G..G..CT.G..T..C..C..A..T       |
| mATP7A       | 2035 | ATGAGTAATGAAGAAATGATCAACATGCATTCTGCTATGTTTCTGGAGCGTCAGATCCTG  |
| Synth_mAtp7a | 2035 | ...TCA..C..G..G....T..T....CAG...A....CT....AA.A..A..AT..     |
| mATP7A       | 2095 | CCAGGACTGTCCATTATGAATTTGTTGTCCCTTTTATTGTGTCTACCTGTACAGTTTTGT  |
| Synth_mAtp7a | 2095 | ..T..GT..AGT..C....CC.AC.AAGTT.GC.TC.T..CT.G..A..C..A..C...   |
| mATP7A       | 2155 | GGCGGCTGGTACTTCTACATTCAAGCCTTACAAAGCACTGAAGCATAAGACAGCAAACATG |
| Synth_mAtp7a | 2155 | ..G..G....T..T..T..C..A..A..T..G..TT....A..C..A..C..G..T...   |
| mATP7A       | 2215 | GATGTGCTGATTGTGCTGGCAACCACCATCGCATTTGCCTACTCTCTGGTTATTCTTCTG  |
| Synth_mAtp7a | 2215 | ..C..AT....C..CT....T..T..T..T..T..C..T..TAG.T....C..CT.GT..  |
| mATP7A       | 2275 | GTTGCAATGTTTGAGAGAGCCAAAGTGAACCCCATTTACCTTCTTTGATACACCTCCTATG |
| Synth_mAtp7a | 2275 | ..A..T....C..AC....A..G..C..T..T..C..A..T..C..C..T..C..C...   |
| mATP7A       | 2335 | CTGTTTGTGTTTATTGCACTAGGACGATGGCTGGAACATATAGCGAAGGGCAAAACCTCC  |
| Synth_mAtp7a | 2335 | T.A..C..A..C..C..CT....GA....T....G..C..C..T..A..G..G..TAGT   |
| mATP7A       | 2395 | GAGGCTCTTGCAAAGCTAATTTTATTACAAAGCAACTGAAGCCACTATTGTAACTCTGAAC |
| Synth_mAtp7a | 2395 | ..A..CT.G..T..AT.G..CAGTC....G..T..C..G..T..C..C..T..CT....T  |
| mATP7A       | 2455 | TCTGAAAATCTCCTCCTGAGTGAAGAACAAGTGGATGTGGAACCTGTACAACGTGGAGAT  |
| Synth_mAtp7a | 2455 | AG...G..CT.GT.GT..TCA..G..G..G..T..C..T..GT.G..T..GA.A..G..C  |
| mATP7A       | 2515 | ATCATTAAGGTTGTTCCAGGAGGCAAATTTCCAGTGGATGGCCGTGTTATTGAAGGACAT  |
| Synth_mAtp7a | 2515 | ..T..C..A..C..C..T..G..G..G..C..T..T..C..GA.A..A..C..G..G..C  |
| mATP7A       | 2575 | TCTATGGTGGACGAGTCCCTCATCACAGGGGAGGCAATGCCTGTGGCTAAGAAACCTGGC  |
| Synth_mAtp7a | 2575 | AG.....T..T..AAGTT.G..T..T..A..A..T....C..T..C..A..G..C..G    |
| mATP7A       | 2635 | AGCACGGTGATTGCAGGTTCCATTAACCAGAAATGGATCTCTCCTCATCCGAGCAACACAT |
| Synth_mAtp7a | 2635 | TCA..C..T..C..T..GAGT..C..T..A..C..GAG.T.GT.G..TA....T..T..C  |
| mATP7A       | 2695 | GTGGGAGCAGATACAACCCTTTCTCAGATCGTCAAACCTTGTGGAGGAGGCACAGACATCA |
| Synth_mAtp7a | 2695 | ..T..G..T..C..C..AT.GAG...A..T..T..GT.G..T..A..A..T..A..CAGT  |
| mATP7A       | 2755 | AAGGCTCCTATCCAGCAGTTTGCAGACAAACTCAGTGGCTACTTTGTTCTTTTCATCGTC  |
| Synth_mAtp7a | 2755 | ..A..C..C..T..A..A..C..T..T..GT.GTCA..G..T..C..C..C..T..T..T  |
| mATP7A       | 2815 | TTGGTTTCCATTGTTACCCTCTTGGTGTGGATTATAATTGGATTTCAAAATTTTGAAATT  |
| Synth_mAtp7a | 2815 | C.A..CAGT..C..C..TT.GC.C..T....C..T..A..G..C..G..C..C..G..C   |
| mATP7A       | 2875 | GTGGAAACCTACTTTCCCGGCTATAATAGAAGCATCTCCCGAACAGAAACCATAATACGC  |
| Synth_mAtp7a | 2875 | ..T..G.....                                                   |
| mATP7A       | 2935 | TTTGCTTTCCAAGCCTCTATCACGGTTCTGTGTATCGCATGTCCCTGTTCACTGGGACTA  |
| Synth_mAtp7a | 2935 | .....                                                         |

|              |      |                                                               |
|--------------|------|---------------------------------------------------------------|
| mATP7A       | 2995 | GCCACTCCAACCTGCTGTGATGGTGGGCACAGGAGTAGGTGCTCAGAATGGCATACTTATC |
| Synth_mAtp7a | 2995 | .....                                                         |
| mATP7A       | 3055 | AAAGGTGGGGAGCCACTGGAAATGGCTCATAAGGTAAAGGTAGTGGTATTTGATAAGACT  |
| Synth_mAtp7a | 3055 | .....C..G.....                                                |
| mATP7A       | 3115 | GGAACCATCACCCATGGAACCCCAGTAGTGAATCAAGTGAAGGTTCTCGTGGAAAGTAAC  |
| Synth_mAtp7a | 3115 | .....                                                         |
| mATP7A       | 3175 | AAGATATCACGCAATAAGATCCTGGCCATTGTGGGGACTGCAGAAAGTAACAGTGAACAT  |
| Synth_mAtp7a | 3175 | .....                                                         |
| mATP7A       | 3235 | CCTTTAGGAGCAGCTGTAACCAAATATTGCAAAAAGGAGCTGGACACTGAAACCCTGGGT  |
| Synth_mAtp7a | 3235 | .....                                                         |
| mATP7A       | 3295 | ACCTGTACAGATTTCCAGGTTGTACCAGGCTGTGGTATTAGCTGTAAAGTCACCAATATT  |
| Synth_mAtp7a | 3295 | .....                                                         |
| mATP7A       | 3355 | GAAGGTTTGCTACATAAGAGTAACTTGAAGATAGAAGAAAATAACATTAAAAATGCATCC  |
| Synth_mAtp7a | 3355 | .....                                                         |
| mATP7A       | 3415 | CTGGTTCAAATTGATGCAATTAATGAACAGTCATCAACTTCATCTTCTATGATTATTGAT  |
| Synth_mAtp7a | 3415 | .....                                                         |
| mATP7A       | 3475 | GCTCATCTCTCAAATGCTGTTAATACTCAGCAGTACAAAGTCCTCATTGGTAACCGGGAA  |
| Synth_mAtp7a | 3475 | .....                                                         |
| mATP7A       | 3535 | TGGATGATTAGAAATGGTCTTGTGCATAAGTAATGATGTAGATGAATCTATGATTGAACAT |
| Synth_mAtp7a | 3535 | .....                                                         |
| mATP7A       | 3595 | GAAAGAAGAGGTCGGACTGCTGTCTTGGTGACAATCGATGATGAGCTGTGTGGCTTGATT  |
| Synth_mAtp7a | 3595 | .....                                                         |
| mATP7A       | 3655 | GCTATTGCTGATACTGTGAAACCTGAGGCCGAGTTGGCTGTACACATTCTGAAATCTATG  |
| Synth_mAtp7a | 3655 | .....                                                         |
| mATP7A       | 3715 | GGTTTAGAAGTAGTTCTGATGACTGGAGACAACAGTAAACTGCTCGGTCTATTGCTTCT   |
| Synth_mAtp7a | 3715 | .....                                                         |
| mATP7A       | 3775 | CAGGTTGGCATTACTAAGGTGTTTGCTGAAGTTCTACCTTCCCACAAAGTTGCTAAGGTG  |
| Synth_mAtp7a | 3775 | .....                                                         |
| mATP7A       | 3835 | AAGCAGCTCCAAGAGGAGGGCAAACGTGTAGCAATGGTAGGAGATGGAATCAATGACTCC  |
| Synth_mAtp7a | 3835 | .....                                                         |
| mATP7A       | 3895 | CCAGCTCTGGCAATGGCAAACGTTGGAATTGCCATAGGCACAGGCACAGATGTAGCCATT  |
| Synth_mAtp7a | 3895 | .....                                                         |
| mATP7A       | 3955 | GAAGCAGCTGATGTGGTTTTGATAAGGAATGACCTTCTGGATGTTGTGGCAAGTATTGAC  |
| Synth_mAtp7a | 3955 | .....                                                         |
| mATP7A       | 4015 | TTGTCAAGGAAAACAGTCAAGAGGATTCGAATCAATTTTGTCTTTGCTCTAATTTATAAT  |
| Synth_mAtp7a | 4015 | .....                                                         |

|              |      |                                                              |
|--------------|------|--------------------------------------------------------------|
| mATP7A       | 4075 | CTGGTTGGAATCCCATCGCTGCTGGAGTTTTCCTGCCCATCGGTTTGGTTTTACAACCC  |
| Synth_mAtp7a | 4075 | .....                                                        |
| mATP7A       | 4135 | TGGATGGGATCCGCAGCAATGGCCGCTTCATCTGTCTCTGTAGTCCTTTCTTCCCTTTTC |
| Synth_mAtp7a | 4135 | .....                                                        |
| mATP7A       | 4195 | CTCAAGCTTTACAGGAAACCTACGTATGACAATTATGAGTTGCATCCCCGGAGCCACACA |
| Synth_mAtp7a | 4195 | .....                                                        |
| mATP7A       | 4255 | GGACAGAGGAGTCCTTCAGAAATCAGTGTTACGTTGGAATAGATGACACCTCAAGAAAT  |
| Synth_mAtp7a | 4255 | .....                                                        |
| mATP7A       | 4315 | TCTCCAAGGCTGGGTTTGCTGGACCGGATTGTCAACTATAGCAGAGCCTCCATAAATTCA |
| Synth_mAtp7a | 4315 | .....                                                        |
| mATP7A       | 4375 | CTGCTGTCTGACAAGCGCTCCCTGAACAGCGTTGTTACTAGTGAACCTGACAAGCACTCG |
| Synth_mAtp7a | 4375 | .....                                                        |
| mATP7A       | 4435 | CTTCTGGTGGGCGACTTCCGGGAAGATGATGACACCACACTGTAA                |
| Synth_mAtp7a | 4435 | .....                                                        |
